# Supplementary material for: COVID-19 vaccine effectiveness against symptomatic SARS-CoV-2 infections, COVID-19 related hospitalizations and deaths, among individuals aged ≥65 years in Portugal: A cohort study based on data-linkage of national registries February-September 2021
Source: PubMed Central journal article supplement (PMC9469958; doi:10.1371/journal.pone.0274008), 2022-09-13
Supplement: pone.0274008.s003.pdf [file pone.0274008.s003.pdf]

S1 Table. Demographic characteristics and vaccine status of cohort individuals aged 65 to 79 years old, Portugal, March–August 2021 (n = 1,414,909).

|                                           | Vaxzevria<br>499,770 | Janssen<br>40,484  | mRNA<br>760,176    | Unvaccinated<br>114,479 |
|-------------------------------------------|----------------------|--------------------|--------------------|-------------------------|
| Age (years), median (IQR)                 | 71.0 (68.0 - 75.0)   | 69.0 (67.0 - 72.0) | 71.0 (68.0 - 75.0) | 71.0 (68.0 - 75.0)      |
| Age group, (%)                            |                      |                    |                    |                         |
| 65-69                                     | 178,573 (35.7%)      | 21,890 (54.1%)     | 297,449 (39.1%)    | 43,262 (37.8%)          |
| 70-74                                     | 194,191 (38.9%)      | 12,776 (31.6%)     | 257,681 (33.9%)    | 39,124 (34.2%)          |
| 75-79                                     | 127,006 (25.4%)      | 5,818 (14.4%)      | 205,046 (27.0%)    | 32,093 (28.0%)          |
| Sex Male, n (%)                           | 221,369 (44.3%)      | 18,407 (45.5%)     | 332,106 (43.7%)    | 51,302 (44.8%)          |
| Region, n (%)                             |                      |                    |                    |                         |
| Alentejo                                  | 27,817 (5.6%)        | 2,592 (6.4%)       | 35,331 (4.6%)      | 4,538 (4.0%)            |
| Algarve                                   | 27,567 (5.5%)        | 6,318 (15.6%)      | 29,480 (3.9%)      | 12,502 (10.9%)          |
| Centro                                    | 97,820 (19.6%)       | 10,582 (26.1%)     | 133,943 (17.6%)    | 19,034 (16.6%)          |
| LVT                                       | 212,153 (42.5%)      | 11,646 (28.8%)     | 234,669 (30.9%)    | 41,354 (36.1%)          |
| Norte                                     | 132,245 (26.5%)      | 8,864 (21.9%)      | 322,412 (42.4%)    | 25,612 (22.4%)          |
| Missing                                   | 2,168 (0.4%)         | 482 (1.2%)         | 4,341 (0.6%)       | 11,439 (10.0%)          |
| EDI Quintile, n (%)                       |                      |                    |                    |                         |
| Q1 (least deprived)                       | 66,389 (13.3%)       | 10,092 (24.9%)     | 118,691 (15.6%)    | 13,898 (12.1%)          |
| Q2                                        | 78,578 (15.7%)       | 3,584 (8.9%)       | 112,593 (14.8%)    | 13,854 (12.1%)          |
| Q3                                        | 74,384 (14.9%)       | 3,438 (8.5%)       | 111,310 (14.6%)    | 13,251 (11.6%)          |
| Q4                                        | 137,234 (27.5%)      | 10,097 (24.9%)     | 221,903 (29.2%)    | 27,751 (24.2%)          |
| Q5 (most deprived)                        | 141,017 (28.2%)      | 12,791 (31.6%)     | 191,338 (25.2%)    | 34,286 (29.9%)          |
| Missing                                   | 2,168 (0.4%)         | 482 (1.2%)         | 4,341 (0.6%)       | 11,439 (10.0%)          |
| Number of chronic diseases, n (%)         |                      |                    |                    |                         |
| 0                                         | 114,499 (22.9%)      | 11,877 (29.3%)     | 172,206 (22.7%)    | 56,005 (48.9%)          |
| 1                                         | 130,811 (26.2%)      | 10,636 (26.3%)     | 199,291 (26.2%)    | 24,891 (21.7%)          |
| 2                                         | 123,914 (24.8%)      | 9,162 (22.6%)      | 187,622 (24.7%)    | 17,238 (15.1%)          |
| 3                                         | 79,620 (15.9%)       | 5,507 (13.6%)      | 121,101 (15.9%)    | 9,755 (8.5%)            |
| 4                                         | 34,814 (7.0%)        | 2,274 (5.6%)       | 54,174 (7.1%)      | 4,406 (3.8%)            |
| 5+                                        | 16,112 (3.2%)        | 1,028 (2.5%)       | 25,782 (3.4%)      | 2,184 (1.9%)            |
| Number of SARS-CoV-2 tests in 2021, n (%) |                      |                    |                    |                         |
| 0                                         | 390,166 (78.1%)      | 30,999 (76.6%)     | 597,080 (78.5%)    | 88,703 (77.5%)          |
| 1                                         | 66,129 (13.2%)       | 5,226 (12.9%)      | 95,874 (12.6%)     | 14,323 (12.5%)          |
| 2                                         | 23,741 (4.8%)        | 1,865 (4.6%)       | 34,980 (4.6%)      | 4,943 (4.3%)            |
| 3                                         | 8,557 (1.7%)         | 798 (2.0%)         | 12,593 (1.7%)      | 2,021 (1.8%)            |
| 4-9                                       | 9,835 (2.0%)         | 1,277 (3.2%)       | 16,586 (2.2%)      | 3,514 (3.1%)            |
| 10+                                       | 1,342 (0.3%)         | 319 (0.8%)         | 3,063 (0.4%)       | 975 (0.9%)              |
| Any other vaccine, n (%)†                 | 325,333 (65.1%)      | 18,503 (45.7%)     | 497,594 (65.5%)    | 21,684 (18.9%)          |

† received at least one of the following vaccines since 2016, influenza, pn23, pcv 7, 10 or 13
