# Supplementary material for: COVID-19 vaccine effectiveness against symptomatic SARS-CoV-2 infections, COVID-19 related hospitalizations and deaths, among individuals aged ≥65 years in Portugal: A cohort study based on data-linkage of national registries February-September 2021
Source: PubMed Central journal article supplement (PMC9469958; doi:10.1371/journal.pone.0274008), 2022-09-13
Supplement: pone.0274008.s004.pdf [file pone.0274008.s004.pdf]

S2 Table. Demographic characteristics and vaccine status of cohort individuals aged 80 or more years old, Portugal, February–August 2021 (n = 470,025).

|                                           | Vaxzevria<br>8,509 | Janssen<br>2,191   | mRNA<br>435,322    | Unvaccinated<br>24,003 |
|-------------------------------------------|--------------------|--------------------|--------------------|------------------------|
| Age (years), median (IQR)                 | 82.0 (80.0 - 86.0) | 85.0 (82.0 - 88.0) | 84.0 (82.0 - 88.0) | 86.0 (83.0 - 90.0)     |
| Age group, (%)                            |                    |                    |                    |                        |
| 80-84                                     | 5,681 (66.8%)      | 1,078 (49.2%)      | 222,717 (51.2%)    | 8,997 (37.5%)          |
| 85-89                                     | 2,022 (23.8%)      | 732 (33.4%)        | 145,526 (33.4%)    | 8,137 (33.9%)          |
| 90-94                                     | 660 (7.8%)         | 304 (13.9%)        | 54,263 (12.5%)     | 4,879 (20.3%)          |
| 95+                                       | 146 (1.7%)         | 77 (3.5%)          | 12,816 (2.9%)      | 1,990 (8.3%)           |
| Sex Male, n (%)                           | 3,517 (41.3%)      | 769 (35.1%)        | 176,846 (40.6%)    | 8,645 (36.0%)          |
| Region, n (%)                             |                    |                    |                    |                        |
| Alentejo                                  | 1,308 (15.4%)      | 186 (8.5%)         | 24,081 (5.5%)      | 1,106 (4.6%)           |
| Algarve                                   | 884 (10.4%)        | 313 (14.3%)        | 15,897 (3.7%)      | 1,412 (5.9%)           |
| Centro                                    | 1,547 (18.2%)      | 519 (23.7%)        | 91,855 (21.1%)     | 4,627 (19.3%)          |
| LVT                                       | 2,710 (31.8%)      | 699 (31.9%)        | 142,581 (32.8%)    | 7,969 (33.2%)          |
| Norte                                     | 2,012 (23.6%)      | 460 (21.0%)        | 159,442 (36.6%)    | 8,095 (33.7%)          |
| Missing                                   | 48 (0.6%)          | 14 (0.6%)          | 1,466 (0.3%)       | 794 (3.3%)             |
| EDI Quintile, n (%)                       |                    |                    |                    |                        |
| Q1 (least deprived)                       | 1,078 (12.7%)      | 366 (16.7%)        | 76,030 (17.5%)     | 3,836 (16.0%)          |
| Q2                                        | 1,032 (12.1%)      | 285 (13.0%)        | 68,094 (15.6%)     | 3,403 (14.2%)          |
| Q3                                        | 1,112 (13.1%)      | 268 (12.2%)        | 66,021 (15.2%)     | 3,582 (14.9%)          |
| Q4                                        | 2,294 (27.0%)      | 519 (23.7%)        | 120,749 (27.7%)    | 6,312 (26.3%)          |
| Q5 (most deprived)                        | 2,945 (34.6%)      | 739 (33.7%)        | 102,962 (23.7%)    | 6,076 (25.3%)          |
| Missing                                   | 48 (0.6%)          | 14 (0.6%)          | 1,466 (0.3%)       | 794 (3.3%)             |
| Number of chronic diseases, n (%)         |                    |                    |                    |                        |
| 0                                         | 956 (11.2%)        | 313 (14.3%)        | 44,531 (10.2%)     | 8,927 (37.2%)          |
| 1                                         | 1,529 (18.0%)      | 382 (17.4%)        | 82,962 (19.1%)     | 3,687 (15.4%)          |
| 2                                         | 2,024 (23.8%)      | 523 (23.9%)        | 112,314 (25.8%)    | 4,258 (17.7%)          |
| 3                                         | 1,885 (22.2%)      | 471 (21.5%)        | 96,833 (22.2%)     | 3,620 (15.1%)          |
| 4                                         | 1,207 (14.2%)      | 288 (13.1%)        | 58,377 (13.4%)     | 2,002 (8.3%)           |
| 5+                                        | 908 (10.7%)        | 214 (9.8%)         | 40,305 (9.3%)      | 1,509 (6.3%)           |
| Number of SARS-CoV-2 tests in 2021, n (%) |                    |                    |                    |                        |
| 0                                         | 5,651 (66.4%)      | 1,330 (60.7%)      | 327,670 (75.3%)    | 15,614 (65.1%)         |
| 1                                         | 1,304 (15.3%)      | 329 (15.0%)        | 52,314 (12.0%)     | 3,110 (13.0%)          |
| 2                                         | 624 (7.3%)         | 165 (7.5%)         | 22,336 (5.1%)      | 1,719 (7.2%)           |
| 3                                         | 330 (3.9%)         | 86 (3.9%)          | 11,110 (2.6%)      | 1,033 (4.3%)           |
| 4-9                                       | 524 (6.2%)         | 230 (10.5%)        | 19,170 (4.4%)      | 2,218 (9.2%)           |
| 10+                                       | 76 (0.9%)          | 51 (2.3%)          | 2,722 (0.6%)       | 309 (1.3%)             |
| Any other vaccine, n (%)†                 | 8,047 (94.6%)      | 1,984 (90.6%)      | 420,208 (96.5%)    | 19,865 (82.8%)         |

† received at least one of the following vaccines since 2016, influenza, pn23, pcv 7, 10 or 13
